# Supplementary material for: Response of a Human Lens Epithelial Cell Line to Hyperglycemic and Oxidative Stress: The Role of Aldose Reductase
Source: MDPI journal article supplement (doi:10.3390/antiox12040829), 2023-03-28
Supplement: s1 [file s1]

# **Response of a Human Lens Epithelial Cell Line to Hyperglycemic and Oxidative Stress: the Role of Aldose Reductase**

Gemma Sardelli, Viola Scali, Giovanni Signore, Francesco Balestri, Mario Cappiello,  
Umberto Mura, Antonella Del Corso and Roberta Moschini

## **SUPPLEMENTARY MATERIALS**

### ***Purification of human recombinant sorbitol dehydrogenase.***

During the purification steps the sorbitol dehydrogenase (SDH) activity was assayed at 37°C using D-fructose as substrate, measuring the decrease in absorbance at 340 nm, which corresponds to NADH oxidation. The reaction mixture (0.7 ml final volume) contained 0.24 mM NADH and 0.4 M D-fructose in 100 mM Tris-HCl buffer, pH 7.4; the reaction was initiated by addition of the substrate. One unit of enzyme activity is defined as the amount of SDH that catalyzes the oxidation of 1  $\mu$ mol of NADH/min. Human SDH was expressed in *Escherichia coli* BL21 cells containing an expression plasmid pET-30a-hSDH (Eurofins) and purified using an anion-exchange chromatography and a dye-affinity chromatography. Briefly the crude extract was applied to a DEAE-Sepharose CL-6B (Millipore) column (2.8 x 8.5 cm) equilibrated with 50 mM sodium phosphate buffer pH 7.0 (P buffer) containing 0.5 mM DTT. The flow rate was 20 mL/h, and 3-mL fractions were collected. Fractions showing SDH activity (Figure S1) were pooled, concentrated using an Amicon YM30 ultrafiltration membrane and applied on an Affi-Gel Blue (Bio Rad) column (1.4 x 7 cm) previously equilibrated with P buffer. The flow rate was 25 mL/h and 2.5 mL fractions were collected. The column was initially eluted with P buffer until the absorbance at 280 nm was approximately 0.3 and then with the same buffer supplemented with 0.37 M NaCl until the absorbance at 280 nm of the fractions reached the basal value. Finally, SDH was eluted with P buffer supplemented with 0.37 M NaCl, 0.1 mM NAD<sup>+</sup> and 2 mM DTT (Figure S2). The homogeneity of the protein preparation was verified by SDS-PAGE (Figure S3). The specific activity of the purified enzyme (measured in the above conditions) was 269  $\pm$  15 U/mg. The purified enzyme was stored at -80°C in a 20% (v/v) glycerol solution until used.

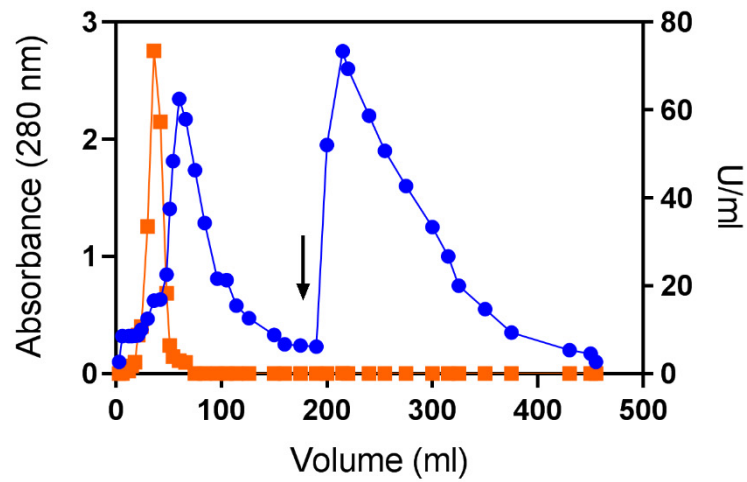

**Figure S1. Elution profile of the DEAE-Sepharose CL-6B chromatography column.** Blue and orange symbols refer to absorbance at 280 nm and sorbitol dehydrogenase activity, respectively. The arrow refers to the addition of 0.5 M NaCl to the elution buffer.

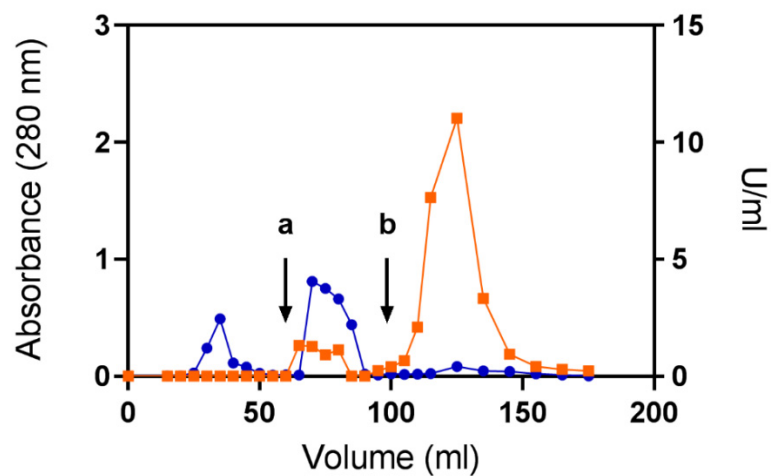

**Figure S2. Elution profile of the Affi-Blue gel chromatography column.** Blue and orange lines refer to absorbance at 280 nm and sorbitol dehydrogenase activity, respectively. The arrows a and b refer to the addition to the elution buffer of 0.37 M NaCl alone or supplemented with 0.2 mM NAD<sup>+</sup> and 2 mM DTT, respectively.

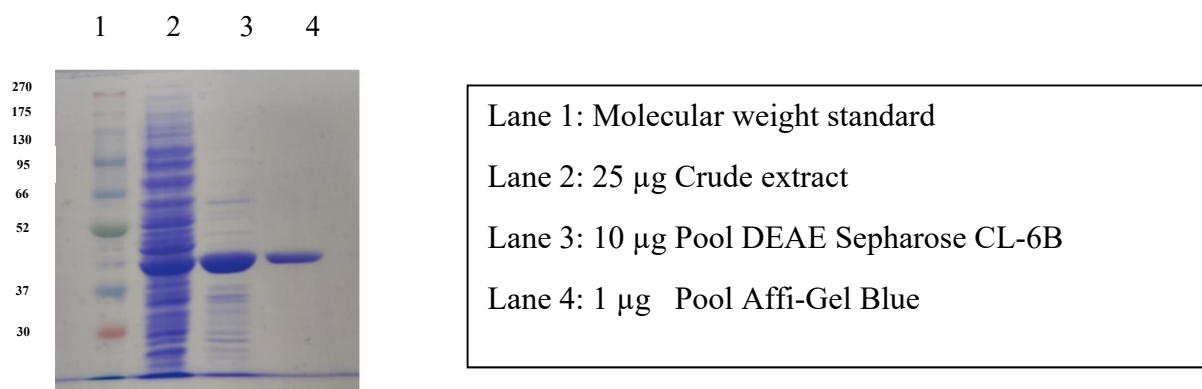

**Figure S3. SDS-PAGE analysis.** Samples from different steps of the purification process were subjected to SDS-PAGE, using a 12% (w/v) acrylamide gel, followed by staining with Coomassie brilliant blue. Numbers alongside refer to molecular mass of protein standards.

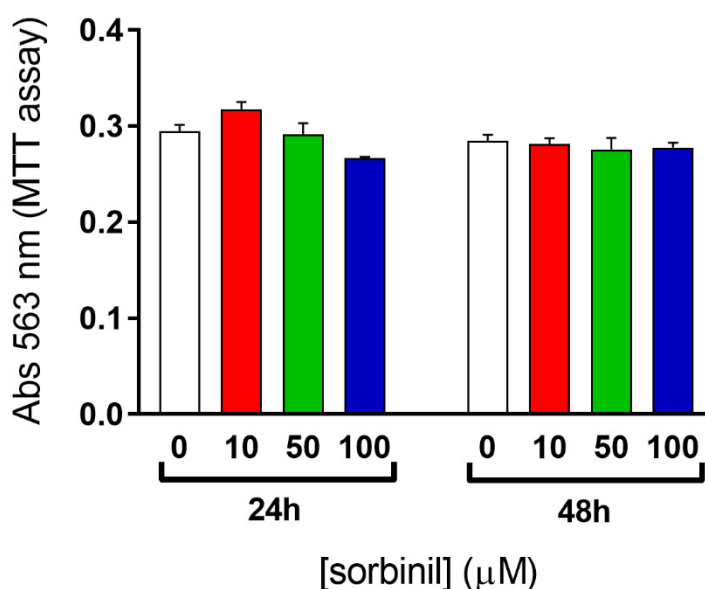

**Figure S4. Effect of Sorbinil on cell viability.** HLE cells were grown as described in *Section 2.2* and maintained for the indicated times in MEM supplemented with 0.05% DMSO in the presence of the indicated Sorbinil concentrations. Cell viability was evaluated as described in *Section 2.3*. Values are reported as the mean  $\pm$  SEM of six independent measurements. Statistical analysis was performed using one way ANOVA with Tukey post hoc test. Significance was evaluated with respect to white bars.

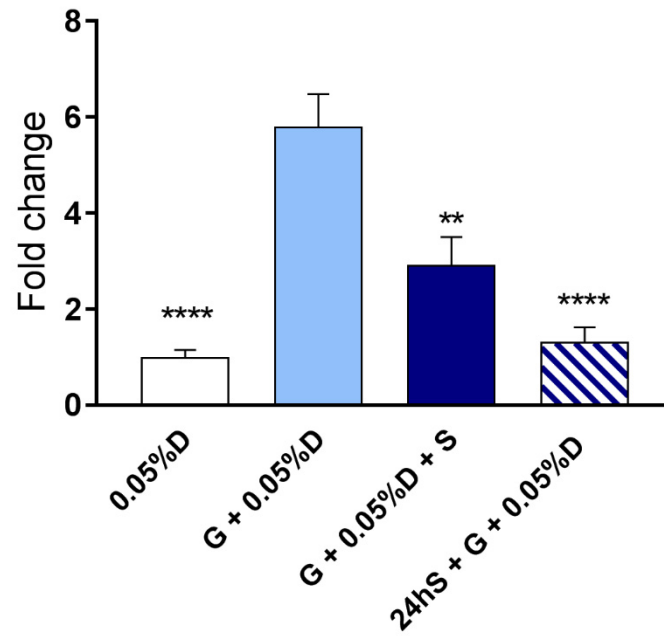

**Figure S5. Effect of Sorbinil on sorbitol accumulation.** HLE cells were grown for 24 h in MEM containing 0.05 % DMSO (D) alone or supplemented with: 75 mM D-glucose (G); 10  $\mu$ M Sorbinil (S). 24h S refer to a 24 h treatment with 10  $\mu$ M Sorbinil before the exposure to 75 mM D-glucose. Sorbitol content is expressed as fold change with respect to values measured in MEM. All values are reported as the mean  $\pm$  SEM of six independent measurements. Statistical analysis was performed using one way ANOVA with Tukey post hoc test. Significance was evaluated with respect to cells incubated in 75 mM D-glucose (\*\*:  $p < 0.01$ ; \*\*\*\*:  $p < 0.0001$ ).

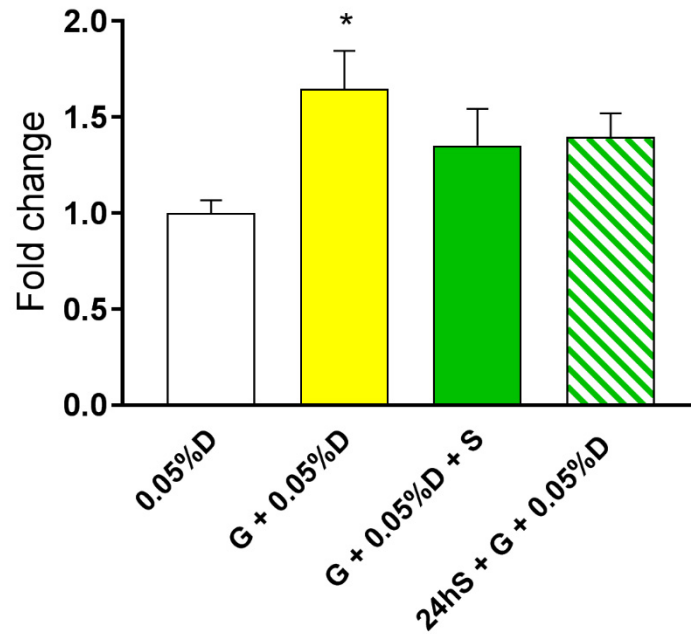

**Figure S6. Effect of Sorbinil on the inflammatory response of HLE cells exposed to hyperglycemic conditions.** NF- $\kappa$ B activation was evaluated in HLE cells grown in MEM containing 0.05 % DMSO (D) supplemented with: 75 mM D-glucose (G); 100  $\mu$ M Sorbinil. (S). 24h S refer to a 24 h treatment with 100  $\mu$ M Sorbinil before the exposure to 75 mM D-glucose. Data are expressed as fold change with respect to values measured in MEM alone. All values are reported as the mean  $\pm$  SEM of six independent measurements. Statistical analysis was performed using one way ANOVA with Tukey post hoc test. Significance was evaluated with respect to cells incubated in MEM containing 0.05 % DMSO (\*:  $p < 0.05$ ).

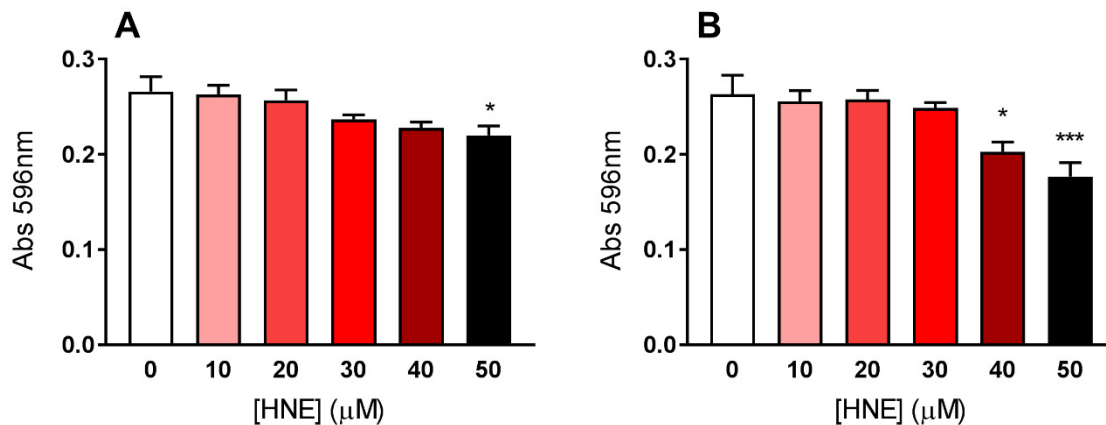

**Figure S7. Effect of HNE on cell vitality.** HLE cells were grown as described in Section 2.2 in MEM in the presence of the indicated HNE concentrations for 6 (A) and 24 h (B) and cell vitality was measured using crystal violet (see Section 2.3). Values are reported as the mean  $\pm$  SEM of six independent measurements. Statistical analysis was performed using one way ANOVA with Tukey post hoc test. Significance was evaluated with respect to untreated cells.
